## 22 **Introduction**

23 Historically, biomedical research has not considered sex as a biological variable (SABV).  
24 Including only one sex in preclinical studies—or not reporting sex at all—is a widespread issue  
25 (Sugimoto et al., 2019). In a cross-disciplinary, quantitative assessment of the 2009 biomedical  
26 literature, Beery and Zucker (2011) found a concerning bias toward the use of males only. As  
27 awareness of this issue increased, in 2016 the National Institutes of Health (NIH) implemented a  
28 policy requiring consideration of SABV in the design, analysis, and reporting of all NIH-funded  
29 preclinical research (NIH, 2015; Clayton, 2018). By addressing the long-standing over-  
30 representation of male non-human animals and cells, the policy was intended not only to  
31 ameliorate health inequities but to improve rigor and reproducibility in biomedical research  
32 (Clayton & Collins, 2014).

33 Although the NIH policy does not explicitly require that males and females be compared  
34 directly with each other, the fact that more NIH-funded researchers must now study both sexes  
35 should lead to an increase in the frequency of such comparisons (Maney, 2016). For example,  
36 there should be more testing for sex-specific responses to experimental treatments. However, in  
37 a follow-up to Beery and Zucker's 2011 study, Woitowich et al. (2020) showed evidence to the  
38 contrary. Their analysis revealed that between 2011 and 2019, although the proportion of  
39 articles that included both sexes significantly increased (see also Will et al., 2017), the number  
40 that analyzed the data by sex did not. This finding contrasts sharply with expectations, given not  
41 only the NIH mandate but also numerous calls over the past decade to disaggregate all  
42 preclinical data by sex and to test for sex differences (e.g., Becker et al., 2016; Potluri et al.,  
43 2017; Shansky & Murphy, 2021; Tannenbaum, 2019; Woitowich & Woodruff, 2019).

44 One potential barrier to SABV implementation is a lack of relevant resources; for  
45 example, not all researchers have received training in experimental design and data analysis  
46 that would allow them to test for sex differences using appropriate statistical approaches. This  
47 barrier is quite important not only because it prevents rigorous consideration of sex in the first

48 place, but also because any less-than-rigorous test for sex differences creates risk for  
49 misinterpretation of results and dissemination of misinformation to other scientists and to the  
50 public (Maney, 2016). In other words, simply calling for the sexes to be compared is not enough  
51 if researchers are not trained to do so; if SABV is implemented haphazardly, it has the potential  
52 to decrease, rather than increase, rigor and reproducibility.

53 In this study, our goal was to analyze recently published articles to determine how often  
54 sex differences are being reported and what statistical evidence is most often used to support  
55 findings of difference. To conduct this assessment, we leveraged the collection of articles  
56 originally curated by Woitowich et al. (2020) for their analysis of the extent to which SABV is  
57 being implemented. Their original list, which was itself generated using criteria developed by  
58 Beery & Zucker (2009), included 720 articles published in 2019 across nine biological  
59 disciplines and 34 scholarly journals. Of those, Woitowich et al. identified 151 articles that  
60 included females and males and that analyzed data disaggregated by sex or with sex as fixed  
61 factor or covariate. Working with that list of 151 articles, we asked the following questions for  
62 each: First, was a sex difference reported? If so, what statistical approaches were used to  
63 support the claim? We focused in particular on studies with factorial designs in which the  
64 authors reported that the effect of one factor, for example treatment, depended on sex. Next, we  
65 asked whether data from males and females were kept separate throughout the article, and if  
66 they were pooled, whether the authors tested for a sex difference before pooling. Finally, we  
67 noted whether the authors used the term “sex” or “gender”, particularly in the context of  
68 preclinical (non-human animal) studies.

69

## 70 **Results**

71 We began with 151 articles, published in 2019, that were determined by Woitowich et al.  
72 to have (1) included both males and females and (2) reported data by sex (disaggregated or  
73 with sex included in the statistical model). Of those, we identified four that contained data from

74 only one sex (e.g., animals of the other sex had been used only as stimulus animals or to  
 75 calculate sex ratios). After excluding those articles, our final sample size was 147. See Table 1  
 76 for the sample sizes of articles from each discipline. More than one-third of the studies were on  
 77 humans (35%) and a similarly large proportion on rats or mice (31%). The remainder  
 78 encompassed a wide variety of species including non-human primates, dogs, cats, pigs, sheep,  
 79 deer, squirrels, racoons, Tasmanian devils, lemur, lions, meerkats, and mongoose. All codes  
 80 and results of coding are shown in Tables S1-S3.

81

82 **Table 1.** Journals surveyed by discipline.

| <b>DISCIPLINE</b>            | <b>JOURNAL 1</b>                  | <b>JOURNAL 2</b>                                        | <b>JOURNAL 3</b>                                                       | <b>JOURNAL 4</b>                                                  | <b>NO. ARTICLES</b> |
|------------------------------|-----------------------------------|---------------------------------------------------------|------------------------------------------------------------------------|-------------------------------------------------------------------|---------------------|
| <b>BEHAVIOR</b>              | Behavioral Ecology & Sociobiology | Animal Behavior                                         | Animal Cognition                                                       | Behavioral Ecology                                                | 40                  |
| <b>BEHAVIORAL PHYSIOLOGY</b> | Journal of Comparative Psychology | Behavioral Neuroscience                                 | Physiology and Behavior                                                | Hormones and Behavior                                             | 20                  |
| <b>ENDOCRINOLOGY</b>         | European Journal of Endocrinology | Journal of Neuroendocrinology                           | Endocrinology                                                          | American Journal of Physiology – Endocrinology & Metabolism       | 27                  |
| <b>GENERAL BIOLOGY</b>       | PLoS Biology                      | Proceedings of the Royal Society B: Biological Sciences | Nature                                                                 | Science                                                           | 9                   |
| <b>IMMUNOLOGY</b>            | Journal of immunology             | Infection and Immunity                                  | Immunity                                                               | Vaccine                                                           | 10                  |
| <b>NEUROSCIENCE</b>          | Journal of Neuroscience           | Neuroscience                                            | Journal of Comparative Neurology                                       | Nature Neuroscience                                               | 9                   |
| <b>PHARMACOLOGY</b>          | Neuropsychopharmacology           | Journal of Psychopharmacology                           | Journal of Pharmacology and Experimental Therapeutics                  | British Journal of Pharmacology                                   | 11                  |
| <b>PHYSIOLOGY</b>            | Journal of Physiology (London)    | American Journal of Physiology – Renal Physiology       | American Journal of Physiology – Gastrointestinal and Liver Physiology | American Journal of Physiology – Heart and Circulatory Physiology | 12                  |
| <b>REPRODUCTION</b>          | Biology of Reproduction           | Reproduction                                            |                                                                        |                                                                   | 9                   |

83

84

85 *Question 1: Was a sex difference reported?*

86 Results pertaining to Question 1 are shown in Fig. 1A. Comparing the sexes, either  
87 statistically or by assertion, was common, occurring in 80% of the articles. A positive finding of a  
88 sex difference was reported in 83 articles, or 56%. Of the articles reporting a sex difference, 41  
89 (49%) mentioned that result in the title or the abstract. Thus, in our sample of articles in which  
90 data were reported by sex, a sex difference was reported in more than half of the articles and in  
91 half of those, the difference was treated as a major finding. In 44% of articles, a sex difference  
92 was neither stated nor implied.

93 These results are broken down by discipline in Fig. 1B. The sexes were most commonly  
94 compared in the field of Endocrinology (93%) and least often in the field of Neuroscience (33%).  
95 When sex differences were found in the field of Endocrinology, however, they were reported in  
96 the title or abstract only 32% of the time. In the field of Reproduction, the sexes were compared  
97 89% of the time and in 100% of those cases, a sex difference was mentioned in the title or  
98 abstract. Sex differences were least likely to be emphasized in the title or abstract in the fields of  
99 General Biology and Neuroscience (11% each).

100 Although a sex difference was claimed in a majority of articles (57%), not all of these  
101 differences were supported with statistical evidence. In nearly a third of the articles reporting a  
102 sex difference, or 24/83 articles, the sexes were never actually compared statistically. In these  
103 cases, the authors claimed that the sexes responded differentially to a treatment when the effect  
104 of treatment was not statistically compared across sex. This issue is explored in more detail  
105 under *Question 2*, below. Finally, we noted at least five articles in which the authors claimed that  
106 there was no sex difference, but did not appear to have tested statistically for one.

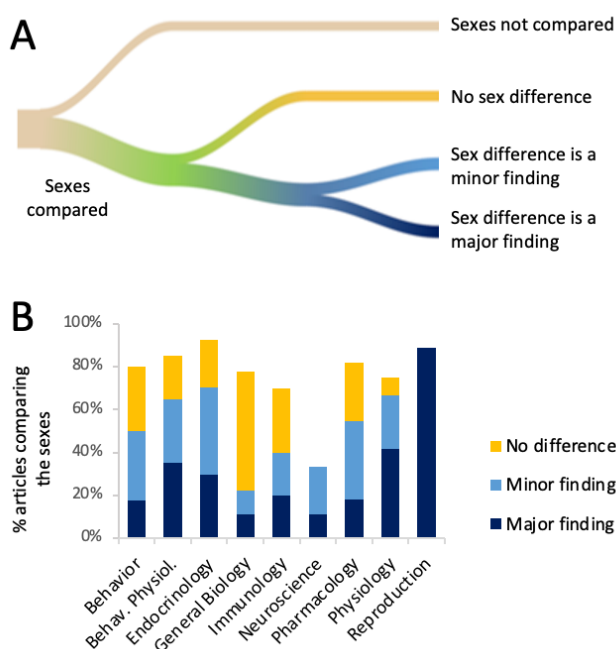

**Fig. 1. The sexes were compared in the majority of the articles analyzed.** (A) The river plot shows the proportions of articles comparing the sexes, either statistically or qualitatively, and the outcomes of those comparisons. The width of each stream is proportional to the number of articles represented in that stream. If a sex difference was mentioned in the title or abstract, the article was coded as “major finding.” For a larger river plot showing how (A) fits into the larger context of the study by Woitowich et al. (2020), please see Fig. S1. (B) The percentage of articles in which sexes were compared is plotted for each discipline. All data are shown in Table S3.

107

108 *Question 2: Did the study have a factorial design with sex as a factor, and if so, did the authors*  
109 *test statistically whether the effect of other factors depended on sex?*

110 For each article, we asked whether it contained a study with a factorial design in which  
111 sex was one of the factors. This design is common when researchers are interested in testing  
112 whether the sexes respond differently to a manipulation such as a drug treatment (Fig 2A).  
113 Below, we use the term “treatment” to refer to any non-sex factor in a factorial design. Such  
114 factors were not limited to treatment, however; they also included variables such as genotype,  
115 season, age, exposure to stimuli, etc. Hypothetical results of a study with such a design are  
116 shown in Fig. 2B. In order to draw a conclusion about whether responses to treatment differed  
117 between females and males, the effect of the treatment must be compared across sex. Although  
118 there are several ways of making such a comparison (see Cumming, 2012; Gelman & Stern,  
119 2006), it is typically done by testing for an interaction between sex and treatment in a two-way  
120 analysis of variance (ANOVA). If the interaction is significant, then a claim can be made that the  
121 sexes responded differently to the treatment. Comparing the treated and control groups within  
122 each sex, in other words disaggregating the data by sex and testing for effects of treatment

123 separately in females and males, does not test whether the sexes responded differently; that is,  
 124 it does not test whether the magnitude of the response differs between females and males  
 125 (Gelman & Stern, 2006; Makin & de Xivry, 2019; Maney, 2016; Nieuwenhuis et al., 2011; Radke  
 126 et al., 2021).

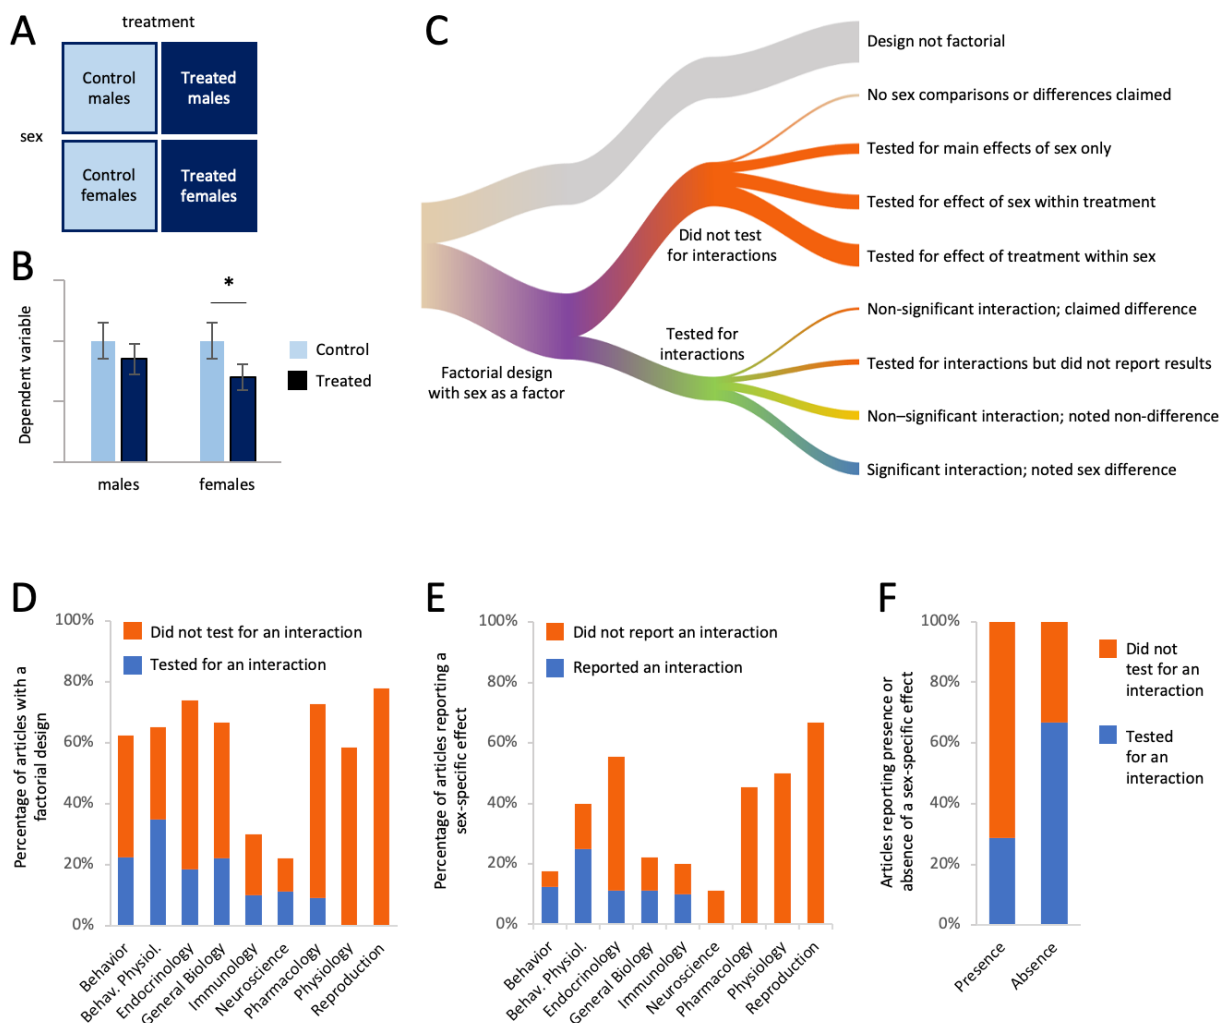

127

**Fig. 2. Factorial designs and sex-specific effects.** For each article, we noted whether it contained a study with a factorial design with sex as a factor (A), for example males and females nested inside treated and control groups. (B) In this hypothetical dataset, there was a significant effect of treatment only in females. Some authors would claim that the treatment had a “sex-specific” effect without testing statistically whether the response to treatment depended on sex. In this example, it does not (see Maney, 2016; Nieuwenhuis et al., 2011). (C) The river plot shows the proportion of articles with a factorial design and the analysis strategy for those. The width of each stream is proportional to the number of articles represented in that stream. (D) The percentage of articles with a factorial design is plotted for each discipline. Only a minority tested for an interaction. (E) The percentage of articles reporting a sex-specific effect is plotted for each discipline. Only a minority reported a significant interaction. (F) Testing for an interaction was less common in articles claiming the presence of a sex-specific effect than in articles claiming the absence of such an effect.

128

129           The results pertaining to Question 2 are shown in Fig 2C-2F. Out of the 147 articles we  
130 analyzed, 91 (62%) contained at least one study with a factorial design in which sex was a  
131 factor (Fig. 2C). Regardless of whether a sex difference was claimed, we found that the authors  
132 explicitly tested for interactions between sex and other factors in only 26 of the 91 articles  
133 (29%). Testing for interactions varied by discipline (Fig. 2D). Authors were most likely to test for  
134 and report the results of interactions in the field of Behavioral Physiology (54% of relevant  
135 articles) and least likely in the fields of Physiology (0%) and Reproduction (0%).

136           Of the studies with a factorial design, 58% reported that the sexes responded differently  
137 to one or more other factors. The language used to state these conclusions often included the  
138 phrase “sex difference” but could also include “sex-specific effect” or that a treatment had an  
139 effect “in males but not females” or vice-versa. Of the 52 articles containing such conclusions,  
140 the authors presented statistics showing a significant interaction, in other words appropriate  
141 evidence that females and males responded differently, in only 15 (29%). In one of those  
142 articles, the authors presented statistical evidence that the interaction was non-significant, yet  
143 claimed a sex-specific effect nonetheless. In an additional five articles, the authors mentioned  
144 testing for interactions but presented no results or statistics (e.g., *p* values) for those  
145 interactions. In the remainder of articles containing claims of sex-specific effects, the authors  
146 took one of two approaches; neither approach included a two-way ANOVA. Instead, authors  
147 proceeded to what would normally be the post-hoc tests conducted after finding a significant  
148 interaction in the ANOVA. In 24 articles (46% of articles with claims of sex-specific effects)  
149 authors reported the effect of treatment within each sex and, reaching different conclusions for  
150 each sex (e.g., finding a *p* value below 0.05 in one sex but not the other), inappropriately argued  
151 that the response to treatment differed between females and males (see Fig. 2B). In seven  
152 other articles claiming a sex-specific effect (14%), the sexes were compared within treatment;  
153 for example authors compared the treated males with the treated females, not considering the  
154 control animals. Neither approach tests whether the treatment had different effects in females



155 and males. Thus, a substantial majority of articles containing claims of sex-specific effects  
156 (71%) did not present statistical evidence to support those claims; in the majority of those  
157 articles (24/37), the sexes were never compared statistically at all.

158         The prevalence of reporting sex-specific effects varied by discipline (Fig. 2E). Articles in  
159 the field of Reproduction were most likely to contain claims of sex-specific effects (67%) and in  
160 Neuroscience least likely (10%). Such claims were most likely to be backed up with statistical  
161 evidence in the field of Behavioral Physiology (63%). None of the articles in the fields of  
162 Reproduction, Physiology, Pharmacology, or Neuroscience contained statistical evidence for the  
163 sex-specific effects that were claimed.

164         The omission of tests for interactions was related to whether researchers were claiming  
165 sex differences or not. Among the articles that were missing tests for interactions and yet  
166 contained conclusions about the presence or absence of sex-specific effects (40 articles), those  
167 claims were in favor of sex differences 88% of the time, compared with only 12% claiming that  
168 the responses in females and males were similar. Of all of the articles claiming similar  
169 responses to treatment, authors tested for interactions in the majority of cases (68%; Fig. 2F).

170

171 *Question 3: Were the data from males and females pooled for any of the analyses?*

172         In this study we included only articles in which data were reported by sex as previously  
173 determined by *Woitowich et al. (2020)*. Thus, any articles in which the sexes were pooled for all  
174 analyses were not included here. We assigned each of the 147 articles to one of three  
175 categories, as follows (Fig. 3A). In 34 (23%) of the articles, data from males and females were  
176 analyzed separately throughout. In 60 (41%) of the articles, males and females were analyzed  
177 in the same statistical models, but in those cases sex was included as a fixed factor or a  
178 covariate. In most cases when sex was a covariate, authors reported the results of the effect of  
179 sex rather than simply controlling for sex. In the remaining 53 (36%) articles, the sexes were  
180 pooled for at least some of the analyses.

181

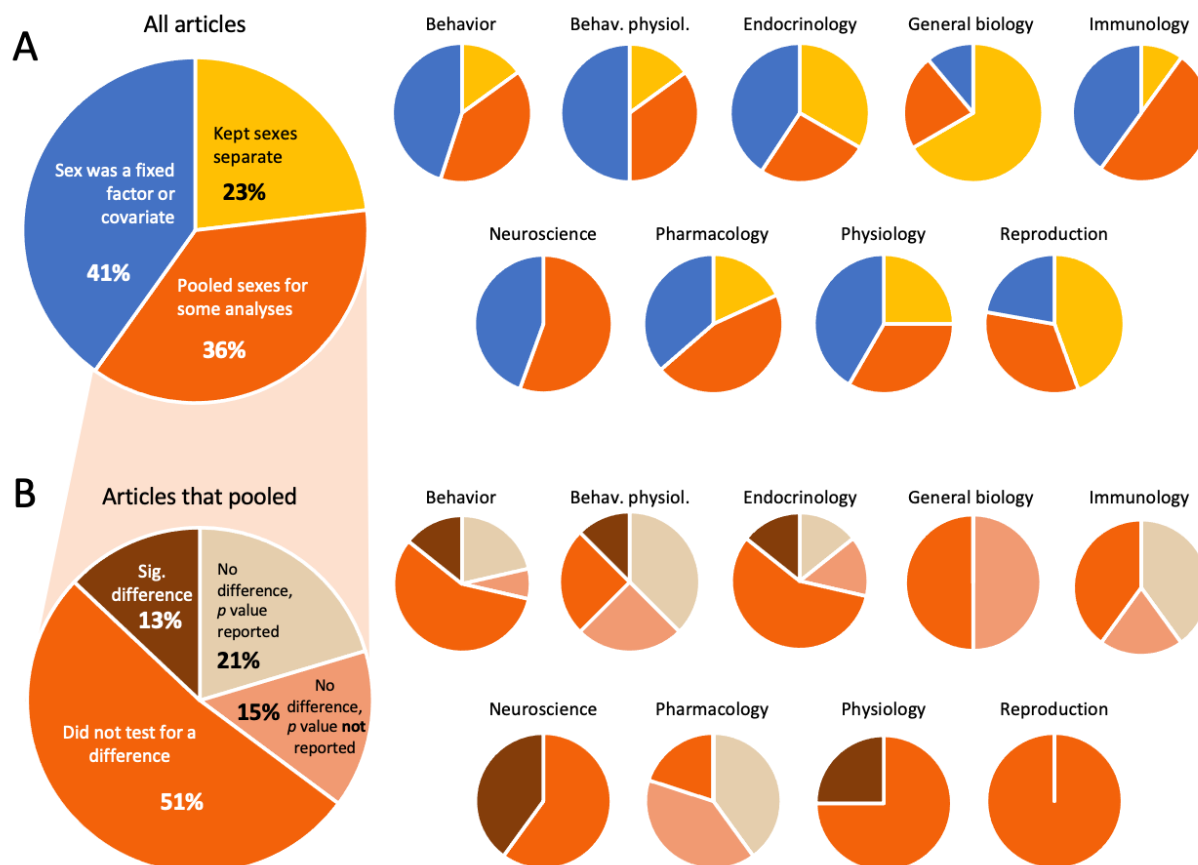

182

183 **Fig. 3. Proportion of articles in which the sexes were pooled.** (A) In our sample, roughly one-third of the  
 184 articles pooled the sexes for at least some analyses. (B) Among the articles that pooled, more than half did not  
 185 test for a sex difference before pooling. In both (A) and (B), the smaller pie charts to show the proportions  
 186 within discipline.  
 187

188 Among the articles in which the sexes were pooled, the authors did so without testing for  
 189 a sex difference more than half of the time (51%; Fig. 3B). When authors did test for a sex  
 190 difference before pooling, they sometimes found a significant difference yet pooled the sexes  
 191 anyway; this occurred in 13% of the articles that pooled. When the sexes were pooled after  
 192 finding no significant difference (36% of the articles that pooled), authors presented *p* values for  
 193 the sex difference about two-thirds of the time (11 out of 18 articles). Those *p* values ranged  
 194 from 0.15 to >0.999. Effect sizes were never reported before pooling.

195 Across disciplines, pooling was most prevalent in Neuroscience (56%) and least  
196 prevalent in General Biology (22%). Males and females were most likely to be kept separate in  
197 General Biology (67%) and most likely to be included in statistical models in the field of  
198 Behavior (50%). When females and males were pooled, authors in the field of Reproduction  
199 were least likely to have tested for a sex difference before pooling (0%) and most likely to do so  
200 in Pharmacology (80%). Pooling after finding a significant difference was most common in the  
201 field of Neuroscience (40% of articles that pooled).

202  
203 *Question 4: Was the term “gender” used for non-human animals?*

204 To refer to the categorical variable comprising male/female or man/woman (all were  
205 binary), the term “sex” was used exclusively in 69% of the articles (Fig. 4). “Gender” was used  
206 exclusively in 9%, and both “sex” and “gender” were used in 19%. When both terms were used,  
207 they usually seemed to be used interchangeably. In 4% of the articles, neither term was used.

208 Of the articles in which the term “gender” was used, 20% of the time it referred to non-  
209 human animals, such as mice, rats, and pigs. In one case, both “sex” and “gender” were used to  
210 refer to non-human animals in the title. In another case, “gender” was used to refer to human  
211 cells.

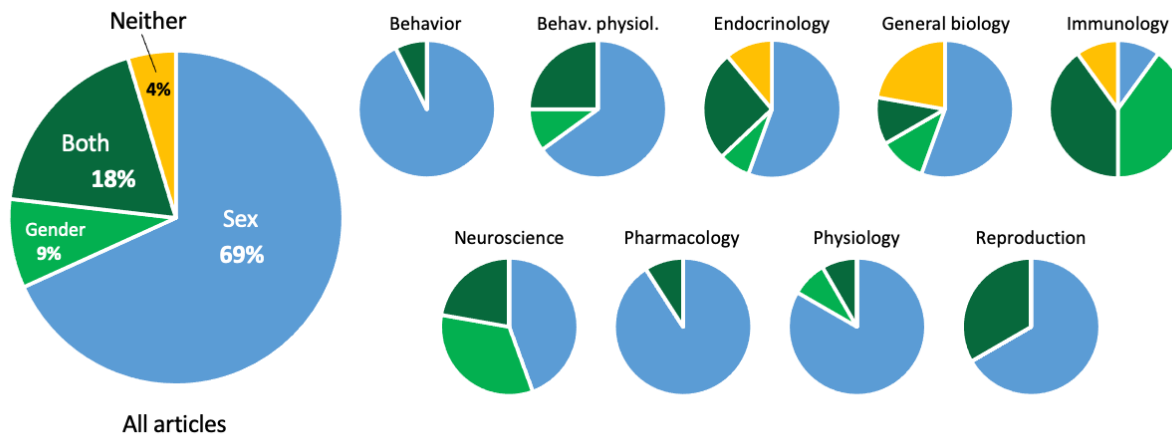

212  
213 **Fig. 4. Proportions of articles using the terms “sex” and “gender”.** The smaller pie charts show the  
214 proportions within discipline.  
215

## 216 **Discussion**

### 217 *Finding sex differences*

218           Woitowich et al. (2020) found that over the past decade, the proportion of biological  
219 studies that included both females and males has increased, but the proportion reporting data  
220 by sex has not. Here, we have taken a closer look at the studies determined by those authors to  
221 have reported data by sex, that is, to have conformed to NIH guidelines on SABV. We found  
222 that in this subset of studies, authors typically also compared the sexes either statistically or  
223 qualitatively (80% of cases). Thus, the authors that complied with NIH guidelines to  
224 disaggregate data usually went *beyond* NIH guidelines to explicitly compare the sexes with each  
225 other. This finding is consistent with a larger analysis of articles in the field of Neuroscience from  
226 2010 to 2014; when authors disaggregated data by sex, they usually proceeded to compare the  
227 sexes as well (Will et al., 2017). It is important to note, however, that both Will et al. (2017) and  
228 Woitowich et al. (2020) found that data were not analyzed by sex in the majority of articles that  
229 included both sexes (see Fig. S1). Thus, our current finding that the sexes were usually  
230 compared should be interpreted in the context of the subset of articles following NIH guidelines.  
231 In the set of articles analyzed here, sex differences were claimed in a majority and were often  
232 highlighted in the title or abstract. We therefore found little evidence that researchers—at least  
233 those who comply with NIH guidelines—are uninterested in sex differences. Conversely, our  
234 finding could indicate that researchers interested in sex differences are primarily the ones  
235 following NIH guidelines.

236

### 237 *Testing for interactions in a factorial design*

238           Testing whether the sexes respond differently to a treatment requires statistical  
239 comparison between the two effects, which is typically done by testing for a sex × treatment  
240 interaction. In our analysis, however, tests for interactions were missing 71% of the time (Fig.  
241 2C, D). In these cases, the most common method for detecting differential effects of treatment

242 was to compare qualitatively the conclusions drawn for each sex; that is, to assert that a  $p$  value  
243 below 0.05 for one sex but not the other (Fig. 2B) represents a meaningful difference between  
244 the effects. But null hypothesis significance testing does not allow for such conclusions  
245 (Cumming, 2012). This error, and the frequency with which it is made, has been covered in  
246 multiple publications; for example Gelman & Stern (2006) titled their commentary “The  
247 difference between ‘significant’ and ‘not significant’ is not itself statistically significant.” Makin &  
248 de Xivry (2019) included the error in their “Top ten list of common statistical mistakes”. In an  
249 analysis of 520 articles in the field of neuroscience, Nieuwenhuis et al. (2011) found that the  
250 error was committed in about half of articles containing a factorial design. The current analysis  
251 showed that, even a decade later, the frequency of this error in the field of neuroscience has not  
252 changed (Fig. 2D), at least when sex is one of the factors under consideration. The frequency of  
253 the error was even higher in most of the other disciplines, particularly Physiology and  
254 Reproduction, for which we found that authors never tested for interactions.

255         Statements such as the following, usually made without statistical evidence, were  
256 common: “The treatment increased expression of gene X in a sex-dependent manner”; “Our  
257 results demonstrate that deletion of gene X produces a male-specific increase in the behavior”;  
258 “Our findings indicate that females are more sensitive to the drug than males”. In some of these  
259 cases, the terms “sex-specific”, “sex-dependent” or “sexual dimorphism” were used in the title of  
260 the article despite a lack of statistical evidence supporting the claim. In many of these articles,  
261 some of which stated that finding a sex difference was the major goal of the study, the sexes  
262 were not statistically compared at all. Thus, a lack of statistical evidence for sex-specific effects  
263 did not prevent authors from asserting such effects. In fact, we found that authors failing to test  
264 for interactions were far more likely to claim sex-specific effects than not (88% vs. 12%; Fig.  
265 2F); they were also more likely to do so than were authors that did test for interactions (88% vs.  
266 62%; Table S3). Together, these results suggest a bias toward finding sex differences. In the  
267 absence of evidence, differences were claimed more often than not. A bias toward finding sex

268 differences, where there are none, could artificially inflate the importance of sex in the reporting  
269 of biological data. Given that findings of sex  $\times$  treatment interactions are rare in the human  
270 clinical literature, with false positives outnumbering false negatives (Wallach et al., 2016), and  
271 given also that sex differences are often misrepresented to the public (Maney, 2014), it is  
272 especially important to base conclusions from preclinical research on solid statistical evidence.

273

#### 274 *Pooling across sex*

275 The set of articles we analyzed was pre-screened by Woitowich (2020) to include only  
276 studies in which sex was considered as a variable. Nonetheless, even in this sample, data were  
277 often pooled across sex for some of the analyses (Fig. 3A). In a majority of these articles,  
278 authors did not test for a sex difference before pooling (Fig. 3B). Thus, for at least some  
279 analyses represented here, the data were not disaggregated by sex, sex was not a factor in  
280 those analyses, and we do not know whether there might have been a sex difference. Even  
281 when authors did test for a sex difference before pooling, the relevant statistics were often not  
282 presented. Finding and reporting a significant sex difference did not seem to reduce the  
283 likelihood that the sexes would be pooled. Note that the original sample of 720 articles in the  
284 study by Woitowich et al. included 251 articles in which sex was either not specified or the  
285 sexes were pooled for all analyses (Fig. S1). Thus, the issue is more widespread than could be  
286 represented in the current study. Pooling is not consistent with the NIH mandate to disaggregate  
287 data by sex, and can prevent detection of meaningful differences. We note further that effect  
288 sizes were not reported before pooling; in addition to  $p$  values, effect sizes would be valuable for  
289 any assessment of whether data from males and females can be pooled without masking a  
290 potentially important difference (Beltz et al., 2019; Diester et al., 2019).

291

292 *Correcting for multiple comparisons*

293           In their article on “Ten statistical mistakes...,” Makin and de Xivry (2019) list another  
294 issue that we found to be prevalent, although we did not collect systematic data on it. Many  
295 authors compared a large number of dependent variables across sex without correcting for  
296 multiple comparisons. The omission of the correction increases the risk of false positives, that  
297 is, making a type I error, which would result in over-reporting of significant effects. This problem  
298 is particularly important for researchers trying to comply with SABV, who may feel compelled to  
299 test for sex differences in every measured variable. For example, we noted articles in which  
300 researchers measured expression of multiple genes in multiple tissues at multiple time points,  
301 resulting in a large number of comparisons across sex. In one such study, authors made 90  
302 separate comparisons in the same set of animals and found 5 significant differences, which is  
303 exactly the number one would expect to find by chance. The prevalence of this issue is difficult  
304 to estimate because opinions vary about when corrections are necessary; nonetheless,  
305 omission of such corrections, when they are clearly needed, is likely contributing to over-  
306 reporting of sex differences broadly across disciplines.

307

308 *Usage of “sex” and “gender”*

309           We found that a large majority of studies on non-human animals used “sex” to refer to  
310 the categorical variable comprising females and males (Fig. 4). In eight articles, we noted usage  
311 of the word “gender” for non-human animals. This usage appears to conflict with current  
312 recommendations regarding usage of “gender”, that is, gender should refer to socially  
313 constructed identities or behaviors rather than biological attributes (Clayton & Tannenbaum,  
314 2016; Holmes & Monks, 2019; Woitowich & Woodruff, 2019). We did not, however, investigate  
315 the authors’ intended meaning of either term. Although definitions of “gender” vary, the term  
316 might be appropriate for non-human animals under certain circumstances, such as when the  
317 influence of social interactions is a main point of interest (Cortes et al., 2019). Operational

318 definitions, even for the term “sex”, are important and, in our experience conducting this study,  
319 almost never included in publications. As others have done (e.g., Duchesne et al., 2020; Cortes  
320 et al., 2019; Holmes & Monks, 2019; Johnson et al., 2009), we emphasize the importance of  
321 clear operational definitions while recognizing the limitations of binary categories.

322

### 323 *Limitations of this study*

324 This study was underpowered for examining these issues within any particular discipline.  
325 For most disciplines, fewer than a dozen articles were in our starting sample; for Neuroscience  
326 and Reproduction, only nine. As a result, after we coded the articles, some categories contained  
327 few or no articles in a given discipline (see Table S3). The within-discipline analyses, particularly  
328 the pie charts in Fig. 3B, should therefore be interpreted with caution. Firm conclusions about  
329 whether a particular practice is more prevalent in one discipline than another cannot be drawn  
330 from the data presented here.

331 As is the case for any analysis, qualitative or otherwise, our coding was based on our  
332 interpretation of the data presentation and wording in the articles. Details of the statistical  
333 approach were sometimes left out, leaving the author’s intentions ambiguous. Although our  
334 approach was as systematic as possible, a small number of articles may have been coded in a  
335 way that did not completely capture those intentions. We believe our sample size, particularly in  
336 the overall analyses across disciplines, was sufficient to reveal the important trends.

337

### 338 *Conclusion*

339 SABV has been hailed as a game-changing policy that is already bringing previously  
340 ignored sex-specific factors to light, particularly for females. In this study, we have shown that a  
341 substantial proportion of claimed sex differences, particularly sex-specific effects of  
342 experimental manipulations, are not supported by statistical evidence. Although only a minority  
343 of studies that include both sexes actually report data by sex (Woitowich et al., 2020), our



344 findings suggest that when data *are* reported by sex, critical statistical analyses are often  
345 missing and the findings likely to be interpreted in misleading ways. Note that in most cases, our  
346 findings do *not* indicate that the conclusions were incorrect; they may have been supported by  
347 appropriate statistical analyses. Our results emphasize the need for resources and training,  
348 particularly those relevant to the study designs and analyses that are commonly used to test for  
349 sex differences. Such training would benefit not only the researchers doing the work, but also  
350 the peer reviewers, journal editors, and program officers who have the power to hold  
351 researchers to a higher standard. Without better awareness of what can and cannot be  
352 concluded from separate analysis of males and females, SABV may have the undesired effect  
353 of reducing, rather than enhancing, rigor and reproducibility.

354

### 355 *Materials and Methods*

356 We conducted our analysis using journal articles from a list published by Woitowich et al.  
357 (2020). In their study, which was itself based on a study by Beery and Zucker (2011), the  
358 authors selected 720 articles from 34 journals in nine biological disciplines. Each discipline was  
359 represented by four journals, with the exception of Reproduction, which was represented by two  
360 (Table 1). To be included, articles needed to be primary research articles not part of a special  
361 issue, describe studies conducted on mammals, and be published in English. For each journal,  
362 Woitowich et al. selected the first 20 articles meeting these criteria published in 2019 (40 articles  
363 for Reproduction). For most disciplines, all articles were published between January and April,  
364 2019; for others, articles could have been published as late as June, August, or October for  
365 Endocrinology, Behavioral Physiology, and Behavior, respectively.

366 Woitowich et al. (2020) coded each article with respect to whether it contained data  
367 analyzed by sex, defined as either that the sexes were kept separate throughout the analysis or  
368 that sex was included as a fixed factor or covariate. Of the original 720 articles analyzed, 151  
369 met this criterion. We began our study with this list of 151 articles. Four articles were excluded

370 because they contained data from only one sex, with animals of the other sex used as stimulus  
371 animals or to calculate sex ratios.

372 All articles were initially scanned by the first author (YGS) to ascertain the experimental  
373 designs in each, and a subset of the articles was discussed between the authors to develop an  
374 analysis strategy. All articles were then coded by the second author (DLM). The final strategy  
375 consisted of four decision trees (Table S1) used to assign articles to hierarchical categories  
376 pertaining to each of four central questions (see below). Each article was assigned to only one  
377 final category per question (Table S2). A subset of the articles was independently coded by  
378 YGS and any discrepancies discussed between the authors until agreement was reached.

379 *Question 1: Was a sex difference reported?* Because we were interested in the  
380 frequency with which sex differences were found, we first identified articles in which the sexes  
381 were explicitly compared. We counted as a comparison any of the following: (1) sex was a fixed  
382 factor in a statistical model; (2) sex was included as a covariate in a statistical model *and* a *p*  
383 value for the effect of sex was reported; (3) a *p* value for a comparison of means between males  
384 and females was presented; (4) the article contained wording suggestive of a comparison, e.g.  
385 “males were larger than females”. We also included articles with wording suggestive of a sex  
386 difference in response to a treatment, for example “the treatment affected males *but not*  
387 females” or “the males responded to treatment, *whereas* the females did not”, or “the treatment  
388 had a *sex-specific* effect”. Similarly, we included here articles with language referring to a non-  
389 difference, for example “we detected no sex differences in size” or “the response to treatment  
390 was similar in males and females.” Articles in which sex was included as a covariate for the  
391 purposes of controlling for sex, rather than comparing the sexes, were not coded as having  
392 compared the sexes (see Beltz et al., 2019). When the sexes were compared but no results of  
393 those comparisons, e.g., *p* values, were reported, that omission was noted and the article was  
394 coded accordingly. Each article in which the sexes were compared was then further coded as

395 either reporting a sex difference or not, and if so, whether a sex difference was mentioned in the  
396 title or abstract.

397 *Question 2: Did the article contain a study with a factorial design?* We looked for studies  
398 with a 2X2 factorial design (Fig. 2A) in which sex was one of the factors. Sex did not need to be  
399 explicitly identified as a fixed factor; we included here all studies comparing across levels of one  
400 factor that comprised females and males with each of those levels. In some cases that factor  
401 was a manipulation, such as a drug treatment or a gene knockout; these factors also included  
402 variables such as age, season, presentation of a stimulus, etc. For simplicity, we refer in this  
403 article to the other factor as “treatment”. Any article containing at least one such study was  
404 coded as having a factorial design. The other articles were coded as containing no comparisons  
405 across sex or as containing group comparisons across sex. The latter category included studies  
406 with sex as a covariate of interest in a model such as a multiple regression, if the authors were  
407 not making any claims about potential interactions between sex and other variables.

408 For studies with a factorial design, we further coded the authors’ strategy of data  
409 analysis. First, we noted whether authors tested for an interaction between sex and treatment.  
410 We included one study in which the effect of treatment was explicitly compared across sex  
411 using a method other than a classic ANOVA (the magnitude of the differences between treated  
412 and control groups were compared across sex). If authors tested statistically whether the effect  
413 of treatment depended on sex, we noted the outcome of that test and the interpretation. Articles  
414 containing no tests for interactions were assigned to one of several sub-categories in the  
415 following order (coded as the first category on this list for which the description was met for any  
416 analysis in the article): tested for effects treatment within sex, tested for effects of sex within at  
417 least one level of treatment, or tested for main effects of sex only. Within each of those  
418 categories we further coded the outcome/interpretation, e.g., sex difference or no sex  
419 difference. Any articles containing statements that the sexes responded differently to treatment  
420 or that the response was “sex-specific” were coded as reporting a sex-specific effect. We also

421 noted when authors reported an absence of such a result. Articles not comparing across sex at  
422 all, with statistical evidence or by assertion, were coded accordingly.

423 *Question 3: Did the authors pool males and females? We assigned articles to one of*  
424 *three categories: analyzed males and females separately throughout, included sex in the*  
425 *statistical model for at least some analyses (with the rest analyzed separately), or pooled for at*  
426 *least some analyses. The second category, included sex in the model, included articles in which*  
427 *AIC or similar statistic was used to choose among models that included sex, although sex may*  
428 *not have been in the model ultimately chosen. This category did not distinguish between*  
429 *analyses including sex as a fixed factor vs. a covariate; this distinction is noted where relevant*  
430 *in Table S2. Any article containing pooled data was coded as pooled, even if some analyses*  
431 *were conducted separately or with sex in the model. For articles that pooled, we further noted*  
432 *whether the authors tested for a sex difference before pooling and, if so, whether  $p$  values or*  
433 *effect sizes were reported.*

434 *Question 4: Did the authors use the term “sex” or “gender”? We searched the articles for*  
435 *the terms “sex” and “gender” and noted whether the authors used one or the other, both, or*  
436 *neither. Terms such as “sex hormones” or “gender role”, which did not refer to sex/gender*  
437 *variables in the study, were excluded from this assessment. For the articles using “gender” we*  
438 *further noted when the term was used for non-human animals.*

439 To visualize the data, we used river plots (Weiner, 2017), stacked bar graphs, and pie  
440 charts based on formulae and data presented in Table S3.

441  
442 *Acknowledgments: We thank Nicole Baran, Isabel Fraccaroli, and Naomi Green for assistance*  
443 *and suggestions in the initial stages of this project, and Chris Goode for making the river plots.*  
444 *We are grateful to Lise Eliot, Chris Goode, and Niki Weitowich for providing comments on the*  
445 *manuscript.*

446

447 *Competing interests:* The authors have no competing interests.

448

449 *References*

450 Becker, J. B., Prendergast, B. J., & Liang, J. W. (2016). Female rats are not more variable than  
451 male rats: a meta-analysis of neuroscience studies. *Biology of Sex Differences*, 7(1), 1-  
452 7.

453 Beltz, A. M., Beery, A. K., & Becker, J. B. (2019). Analysis of sex differences in pre-clinical and  
454 clinical data sets. *Neuropsychopharmacology*, 44(13), 2155-2158.

455 Beery, A. K., & Zucker, I. (2011). Sex bias in neuroscience and biomedical research.  
456 *Neuroscience & Biobehavioral Reviews*, 35(3), 565-572.

457 Clayton, J. A. (2018). Applying the new SABV (sex as a biological variable) policy to research  
458 and clinical care. *Physiology & Behavior*, 187, 2-5.

459 Clayton, J. A., & Collins, F. S. (2014). Policy: NIH to balance sex in cell and animal studies.  
460 *Nature News*, 509(7500), 282.

461 Clayton, J. A., and Tannenbaum, C. (2016). Reporting sex, gender, or both in clinical research?  
462 *JAMA* 316, 1863–1864.

463 Cortes, L. R., Cisternas, C. D., & Forger, N. G. (2019). Does gender leave an epigenetic imprint  
464 on the brain?. *Frontiers in Neuroscience*, 13, 173.

465 Cumming, G. (2012) *Understanding the new statistics: effect sizes, confidence intervals, and*  
466 *meta-analyses*. New York, NY: Routledge.

467 Diester, C. M., Banks, M. L., Neigh, G. N., & Negus, S. S. (2019). Experimental design and  
468 analysis for consideration of sex as a biological variable. *Neuropsychopharmacology*,  
469 44(13), 2159-2162.

470 Duchesne, A., Pletzer, B., Pavlova, M. A., Lai, M. C., & Einstein, G. (2020). Bridging Gaps  
471 Between Sex and Gender in Neurosciences. *Frontiers in Neuroscience*, 14, 561.

472 Gelman, A., & Stern, H. (2006). The difference between “significant” and “not significant” is not  
473 itself statistically significant. *The American Statistician*, 60(4), 328-331.

474 Holmes, M. M., & Monks, D. A. (2019). Bridging sex and gender in neuroscience by shedding a  
475 priori assumptions of causality. *Frontiers in Neuroscience*, 13, 475.

476 Johnson, J. L., Greaves, L., and Repta, R. (2009). Better science with sex and gender:  
477 facilitating the use of a sex and gender-based analysis in health research. *International*  
478 *Journal for Equity in Health*, 8, 14.

479 Makin, T. R., & de Xivry, J. J. O. (2019). Science Forum: Ten common statistical mistakes to  
480 watch out for when writing or reviewing a manuscript. *eLife*, 8, e48175.

- 481 Maney, D. L. (2016). Perils and pitfalls of reporting sex differences. *Philosophical Transactions*  
482 *of the Royal Society B: Biological Sciences*, 371(1688), 20150119.
- 483 Maney, D. L. (2014). Just like a circus: The public consumption of sex differences. *Current*  
484 *Topics in Behavioral Neuroscience*, 19, 279-296.
- 485 Nieuwenhuis, S., Forstmann, B. U., & Wagenmakers, E. J. (2011). Erroneous analyses of  
486 interactions in neuroscience: a problem of significance. *Nature Neuroscience*, 14(9),  
487 1105.
- 488 NIH, Consideration of sex as a biological variable in NIH-funded research. National Institutes of  
489 Health Notice Number: NOT-OD-15–102, issued 6-9-2015.
- 490 Potluri, T., Engle, K., Fink, A. L., Vom Steeg, L. G., & Klein, S. L. (2017). Sex reporting in  
491 preclinical microbiological and immunological research. *mBio*, 8(6), e01868-17.
- 492 Radke, A. K., Sneddon, E. A., & Monroe, S. C. (2021). Studying Sex Differences in Rodent  
493 Models of Addictive Behavior. *Current Protocols*, 1(4), e119.
- 494 Shansky, R. M., & Murphy, A. Z. (2021). Considering sex as a biological variable will require a  
495 global shift in science culture. *Nature Neuroscience*, 24(4), 457-464.
- 496 Sugimoto, C. R., Ahn, Y. Y., Smith, E., Macaluso, B., & Larivière, V. (2019). Factors affecting  
497 sex-related reporting in medical research: a cross-disciplinary bibliometric analysis. *The*  
498 *Lancet*, 393(10171), 550-559.
- 499 Tannenbaum, C., Ellis, R. P., Eyssel, F., Zou, J. & Schiebinger, L. Sex and gender analysis  
500 improves science and engineering. *Nature* 575, 137–146 (2019).
- 501 Wallach, J. D., Sullivan, P. G., Trepanowski, J. F., Steyerberg, E. W., & Ioannidis, J. P. (2016).  
502 Sex based subgroup differences in randomized controlled trials: empirical evidence from  
503 Cochrane meta-analyses. *BMJ*, 355, i5826.
- 504 Weiner, J. (2017). Riverplot: Sankey or Ribbon Plots. [https://CRAN.R-](https://CRAN.R-project.org/package=riverplot)  
505 [project.org/package=riverplot](https://CRAN.R-project.org/package=riverplot).
- 506 Will, T. R., Proaño, S. B., Thomas, A. M., Kunz, L. M., Thompson, K. C., Ginnari, L. A., ... &  
507 Meitzen, J. (2017). Problems and progress regarding sex bias and omission in  
508 neuroscience research. *eNeuro*, 4(6), e0278.
- 509 Voitowich, N. C., & Woodruff, T. K. (2019). Opinion: Research community needs to better  
510 appreciate the value of sex-based research. *Proceedings of the National Academy of*  
511 *Sciences*, 116(15), 7154-7156.
- 512 Voitowich, N. C., Beery, A., & Woodruff, T. (2020). Meta-Research: A 10-year follow-up study  
513 of sex inclusion in the biological sciences. *eLife*, 9, e56344.
